# Supplementary material for: Modeling rhizosphere carbon and nitrogen cycling in Eucalyptus plantation soil
Source: Copernicus journal article supplement (doi:10.5194/bg-2017-302), 2017-09-29
Supplement: Supplementary file [file bg-2017-302-RC4-supplement.pdf]

bg-2017-302

### **Modeling rhizosphere carbon and nitrogen cycling in *Eucalyptus* plantation soil**

The subject authors addresses here is very important and keeping the broadness of the work and big dataset of the work in mind, I would like to suggest that the manuscript can be published but authors should consider a major revision of their manuscript before they re-submit it in this Journal and elsewhere.

#### **Major concerns**

- The manuscript is cursorily written. As for example, in the introduction, Page 2, Lines 7,8, 13, 14, 16 etc.
- The grammar followed in composing the manuscript is not same throughout the manuscript.
- The manuscript doesn't read well.
- The abbreviations which have already been defined earlier are not followed throughout the manuscript.
- The English must be improved before resubmission or the manuscript can be checked or edited by two native English speakers with similar scientific backgrounds/of the same field.
- The sources of the data used for modelling are not written in recognized format.
- For better understanding of the results and to compare with other works, the authors can divide the results and discussion into two separate sections.

#### **Conclusions**

Page 19 line 4: the word should be "Conclusions".

- The authors could not come up with the message of the work. Even, the sentences are not clear in expressing any meaning. All the sentences should be rewritten.

#### **SUPPLEMENTARY MATERIAL**

- Most of the equations used are not presented with the definitions of the components.

### **Minor concerns:**

Page 1, Line 19, 'and' should be used after the penultimate process.

### **2.1 Parameter estimation**

Page 8, Lines 7-8 are not clear.

#### **2.1.2 C and N availability and microbial demand**

Page 4, Lines 27-28: Sentence meaning should be clearer.

Page 6, Line 3: What does it mean by Eucalypt plantation root? Does it mean Eucalyptus plantation roots?

#### **2.2 The evaluation of the rhizospheric model**

Page 8, Line 18: It is not clear what the authors wanted to say.

Figure 4: for giving it self-explained shape, NSE, ME, MAE and RSR should be elaborated again, in the figure title as legend.

Page 11, Figure 6: There are some less-visible numbers. What does it means?

Page 11, Line 12. Full stop is missing.

Page 11, Line 22: Three or there?

Page 11, Line 30, 32, 35: Check. Sentences are not clear in meaning.

Page 13, Line 41; Sentence meaning is not clear.

Page 14, 6: the equivalent or 'equivalent'.

**2.1 Sensitivity analysis of the ForPRAN model:** The subtitle numbering is not correct.

Lines 36-37 are not correct in meaning. (Meaning not clear).

**Table 1.** can be revised as “Values of the input variables used in the model to estimate fine root length, rhizosphere volume and C rhizodeposition

**Figure 2.** Flow chart of processes represented in the ForPRAN model: Presentation must be improved.

**Figure 8 and 9:** Source: Based on not based in

- In, table 1, soil clay content should be “Clay content in soil”.

Page 20, Lines 4-5, Is it the source of the data used for the modelling?

Page 21, Line 2, Line 31, the meaning is not clear.

Eq 19, 20, 27, 28 are not well-presented.

Page 27, Lines 24-25, the sentences are not clear in meaning.
